# Supplementary material for: Surface co-modification enabling efficient and spectrally stable mixed-halide blue light-emitting diodes
Source: Royal Society of Chemistry journal article supplement (doi:10.1039/d4tc01816h), 2024-01-01
Supplement: d4tc01816h1.pdf [file d4tc01816h1.pdf]

## Supplementary information

### Surface Co-modification Enabling Efficient and Spectrally Stable Mixed-halide Blue Light-emitting Diodes

Yongbo Ma,<sup>[a]</sup> Wenda Sun,<sup>[a]</sup> Haolin Lu,<sup>[b]</sup> Yuling Liu,<sup>[a]</sup> Yue Li,<sup>[a]</sup> Rui Yun,<sup>[a]</sup> Mingjian Yuan,<sup>[c]</sup> Libing Zhang,<sup>[d]</sup> Xiyan Li\*,<sup>[a]</sup>

<sup>[a]</sup> Y. Ma, W. Sun, Y. Liu, Y. Li, R.Y., Prof. X. Li

*Institute of Photoelectronic Thin Film Devices and Technology, Nankai University, Tianjin 300350, China; Key Laboratory of Efficient Utilization of solar energy of Tianjin, Tianjin 300071, P. R. China; Engineering Research Center of Thin Film Photoelectronic Technology of Ministry of Education, Tianjin 300350, China.*

*E-mail: xiyan.li@nankai.edu.cn*

<sup>[b]</sup> H. Lu

*School of Materials science and engineering, Nankai university, Tianjin 300350, China.*

<sup>[c]</sup> Prof. M. Yuan

*Key laboratory of Advanced Energy Materials Chemistry (Ministry of Education), Renewable Energy Conversion and Storage Center (RECAST), Nankai University, Tianjin 300071, China; Haihe Laboratory of Sustainable Chemical Transformations, Tianjin 300071, China.*

<sup>[d]</sup> Prof. L. Zhang

*Tianjin Key Laboratory of Molecular Optoelectronic, Department of Chemistry, Tianjin University, Tianjin 300072, China.*

*\* Corresponding author*

## Experimental Section

### Materials

PbBr<sub>2</sub> (99.99%), PbCl<sub>2</sub> (99.99%), Na<sub>2</sub>CO<sub>3</sub> (99.99%) and n-Octanoic acid (OTA) (99%) were purchased from Macklin. Cs<sub>2</sub>CO<sub>3</sub> (99.9%), Rb<sub>2</sub>CO<sub>3</sub> (99.5%), Tetraoctylammonium bromide (TOAB) (98%), Didodecyldimethylammonium bromide (DDAB) (98%), n-Octane (99%) and Ethylacetate (99%) were purchased from Aladdin. O-Diphenylphosphinylhydroxylamine (DPH) (98%), Toluene (99.8%) and FA(AC) (99%) were provided by Bidepharm, Dmreagent and Innochem, respectively. TPBi, Poly-TPD were purchased from Xi'an Polymer Light Technology Corp. PEDOT:PSS, LiF and Al were all purchased from Luminescence Technology Corp. All materials were used directly without further purification.

### Synthesis and purification of perovskite quantum dots

0.1 M Cs<sub>2</sub>CO<sub>3</sub>, Na<sub>2</sub>CO<sub>3</sub>, Rb<sub>2</sub>CO<sub>3</sub> and 0.2 M FA(AC) were prepared in OTA, and Cs<sub>2</sub>CO<sub>3</sub>, Na<sub>2</sub>CO<sub>3</sub>, Rb<sub>2</sub>CO<sub>3</sub> and FA(AC) were mixed into solution A at a volume ratio of 28 : 10 : 2 : 7. Pb precursor solution was formed by adding 0.075 mmol PbBr<sub>2</sub>, 0.05 mmol PbCl<sub>2</sub> and 0.33 mmol TOAB into toluene. 1 mL of solution A was quickly injected into 5 mL of Pb precursor solution for 30 s, followed by 1.7 mL of DDAB for a two-minute reaction. After the reaction was completed, 14 mL of ethyl acetate was added to the mother liquor to remove the unreacted raw materials and excess ligands, and the mixture was dissolved in 2 mL of toluene after centrifugation at 10000 rpm for 2 minutes. 4 mL of ethyl acetate was added again, centrifuged at 10000 rpm for 2 minutes, and finally dissolved in n-octane for the manufacture of the device. The synthesis of DPH-treated QDs only needs to add different amounts of DPH to the precursor solution of Pb and DDAB.

### Device fabrication

The cleaned ITO glass was treated with plasma for 15 minutes. PEDOT:PSS was spun on the ITO substrate at 5000 rpm and then annealed at 150 °C for 10 minutes. Subsequently, (8 mg/mL) Poly-TPD was spun on PEDOT:PSS in the glovebox at 3000 rpm and then annealed at 120 °C for 10 minutes. QD solution was spun on poly-TPD without annealing. Finally, (70 nm) TPBi, (1 nm) LiF, and (100 nm) Al were deposited below a pressure of  $8 \times 10^{-4}$  Pa.

### Characterization

Transmission electron microscopy (TEM) and corresponding elemental mapping images were measured using JEM-2800 at an acceleration voltage of 200 kV. X-ray diffraction (XRD) patterns were obtained by Rigaku Smart Lab 3kW in the 2 $\theta$  ranging from 10 to 50 degrees operating with Cu K $\alpha$  ( $\lambda = 1.5406$  Å). The absorption spectra was obtained by UV-2600. The photoluminescence (PL) emission spectra, photoluminescence quantum yield (PLQY) and time-resolved photoluminescence (TRPL) decay of QD solution were acquired via FS5. Transient absorption (TA) measurements were recorded on a Time-Tech Spectra transient absorption spectrometer (TA100). Fourier transform infrared spectroscopy (FTIR) was measured using TENSOR 37. Nuclear magnetic resonance (NMR) was conducted using AVANCE III HD 400 MHz. X-ray photoelectron spectroscopy (XPS) was measured using Thermo Scientific ESCALAB 250Xi. The film morphology and roughness were characterized by Dimension Icon. Field emission scanning electron microscope (SEM) images were conducted using JSM-7800F. The J-V and L-V curves and electroluminescence (EL) spectra were measured using PR-735 optical test system. The external quantum efficiency (EQE) is calculated by the following formula:<sup>1</sup>

$$EQE = \eta_A \frac{\pi q \int_{380 \text{ nm}}^{800 \text{ nm}} I(\lambda) d\lambda}{683 h c \int_{380 \text{ nm}}^{800 \text{ nm}} I(\lambda) V(\lambda) d\lambda}$$

Where  $\eta_A$  is the current efficiency;  $I(\lambda)$  is the intensity of EL spectrum signal;  $V(\lambda)$  is 1924 CIE standard visual efficiency function.

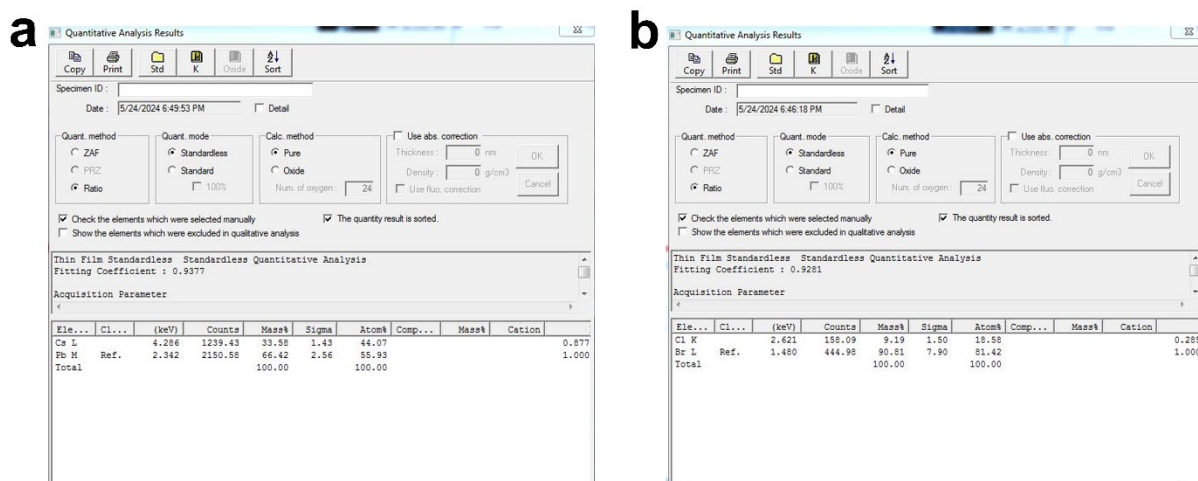

**Fig. S1** The elemental ratios of Cs to Pb and Br to Cl.

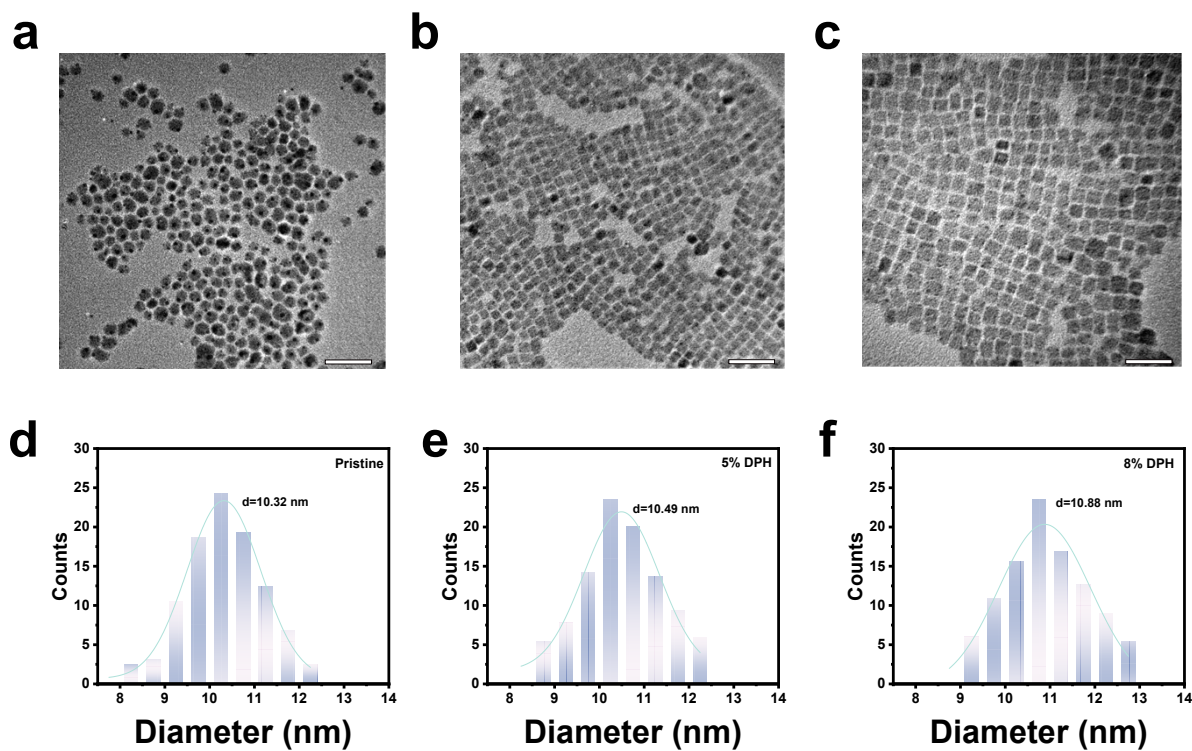

**Fig. S2** TEM images and size distribution of a) pristine, b) 5%, c) 8% DPH-treated QDs.

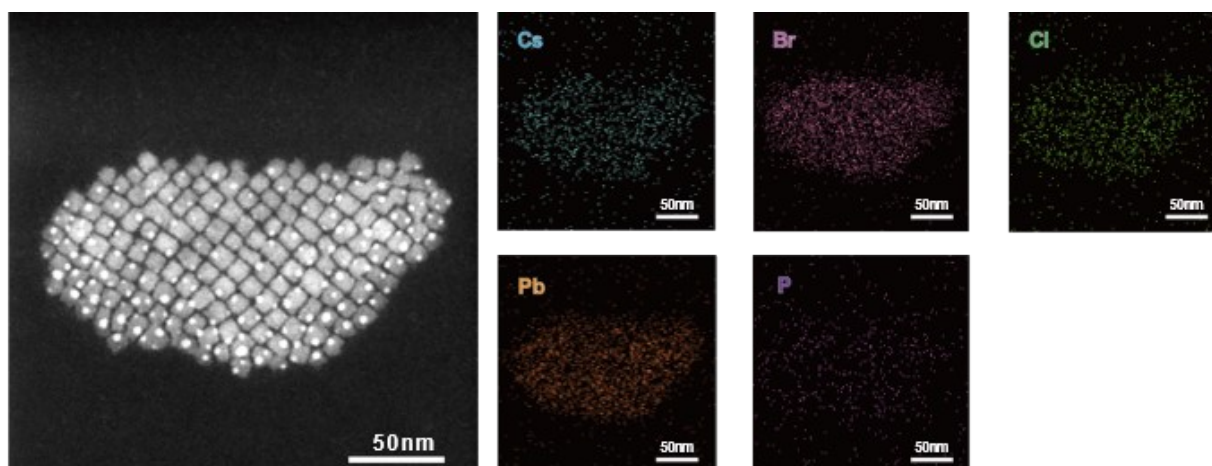

**Fig. S3** HAADF-STEM images and corresponding elemental mapping of the treated QDs.

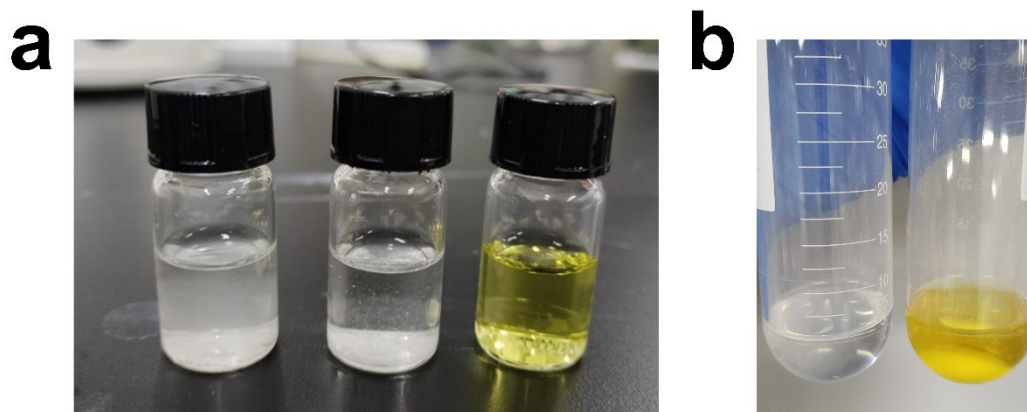

**Fig. S4** The picture of pure DPH, mixture of DPH and  $\text{PbBr}_2$ , and mixture of DPH and HBr in 2 mL of anhydrous ethanol, respectively.

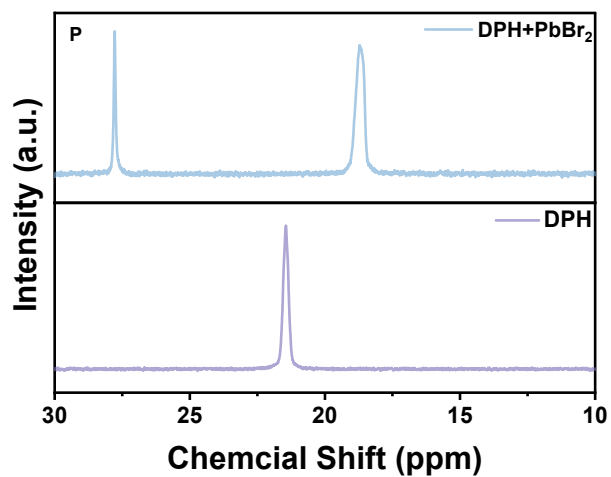

**Fig. S5** NMR spectra of DPH and DPH with PbBr<sub>2</sub>.

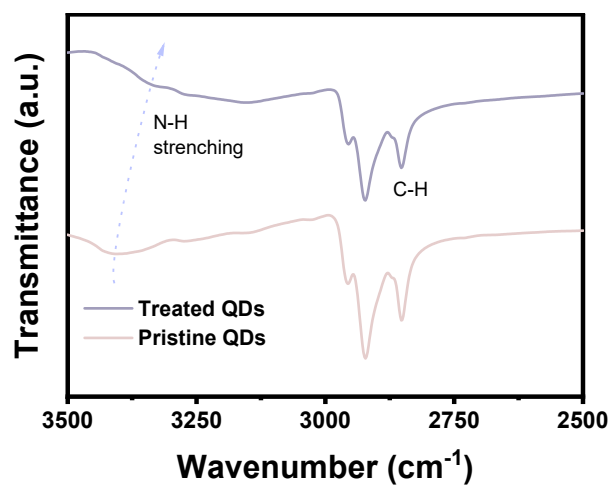

**Fig. S6** FTIR spectra of the pristine and treated QDs.

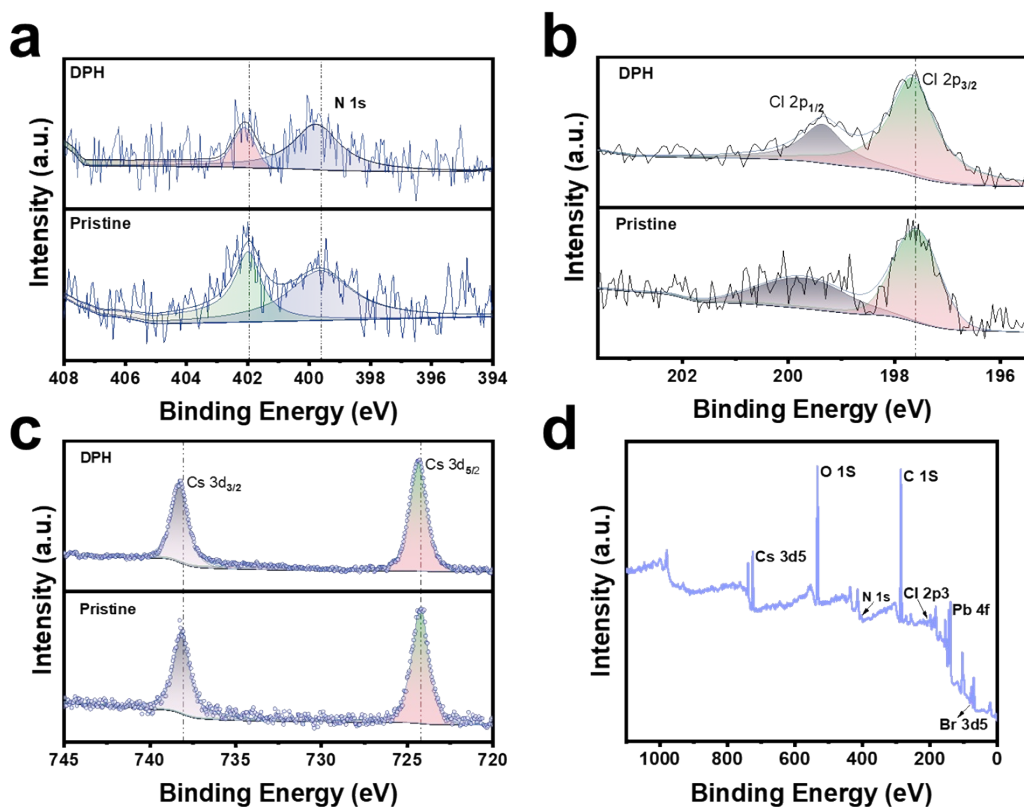

**Fig. S7** XPS spectra of the pristine and DPH-treated QDs for a) N 1s, b) Cl 2p, c) Cs 3d, d) survey.

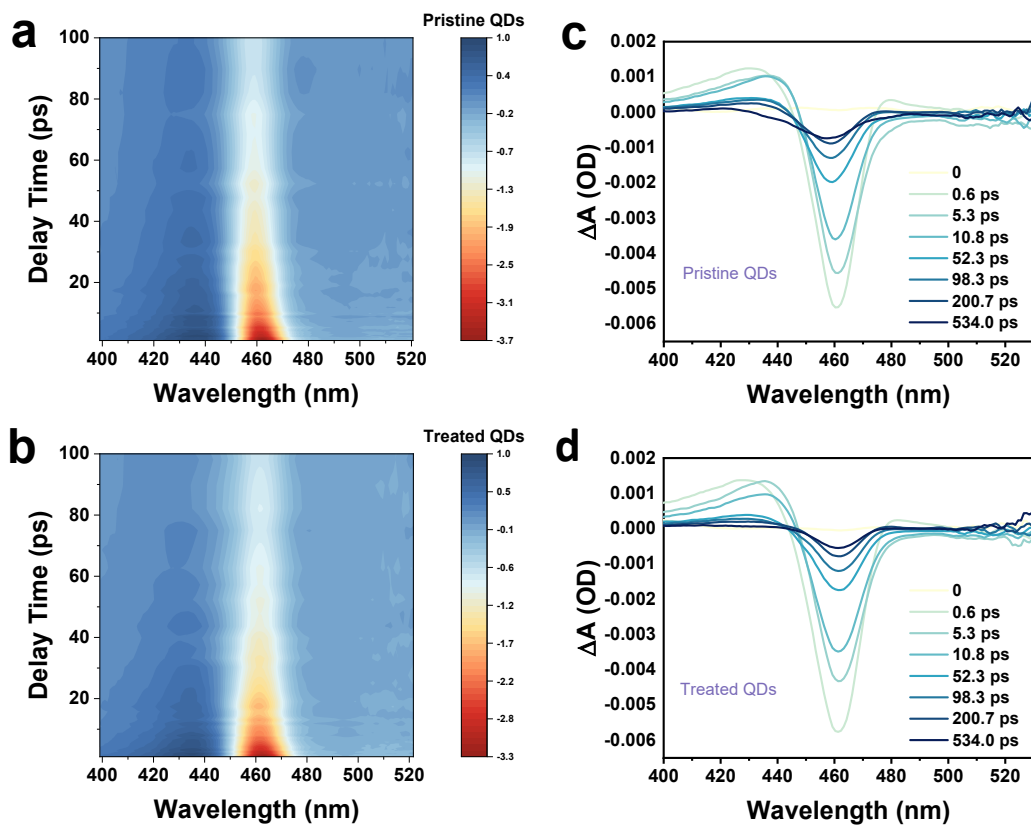

**Fig. S8** TA spectra of a) pristine and b) treated QDs films over delay time. TA spectra of c) pristine and d) treated QD films within a certain time scale.

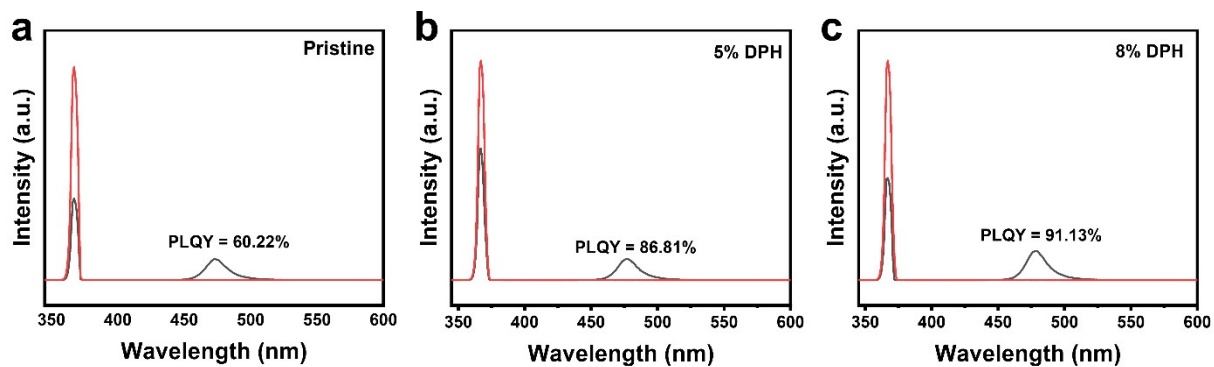

**Fig. S9** PLQY measurements of (a) the pristine QDs and (b) 5% DPH-treated QDs, (c) 8% DPH-treated QDs.

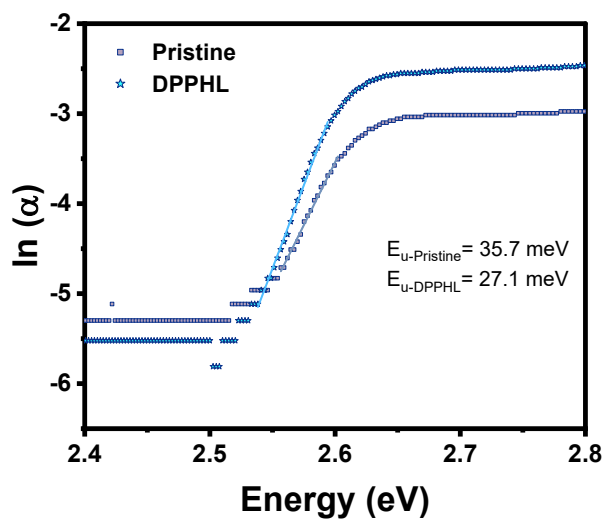

**Fig. S10** Urbach energies of the pristine and treated QDs.



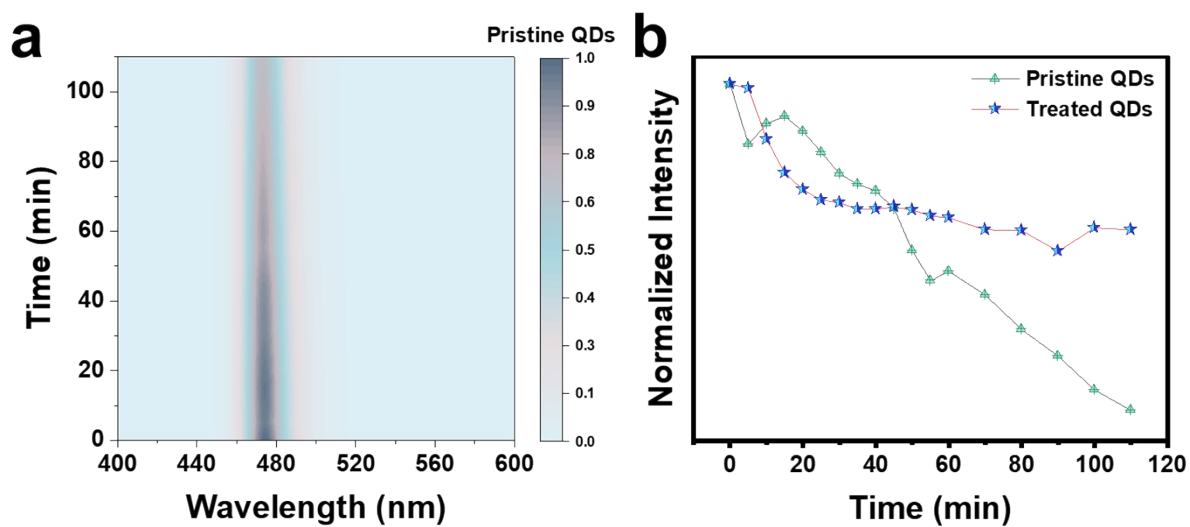

**Fig. S11** Stability of emission spectrum of the pristine and treated QDs solutions under 365nm UV light.

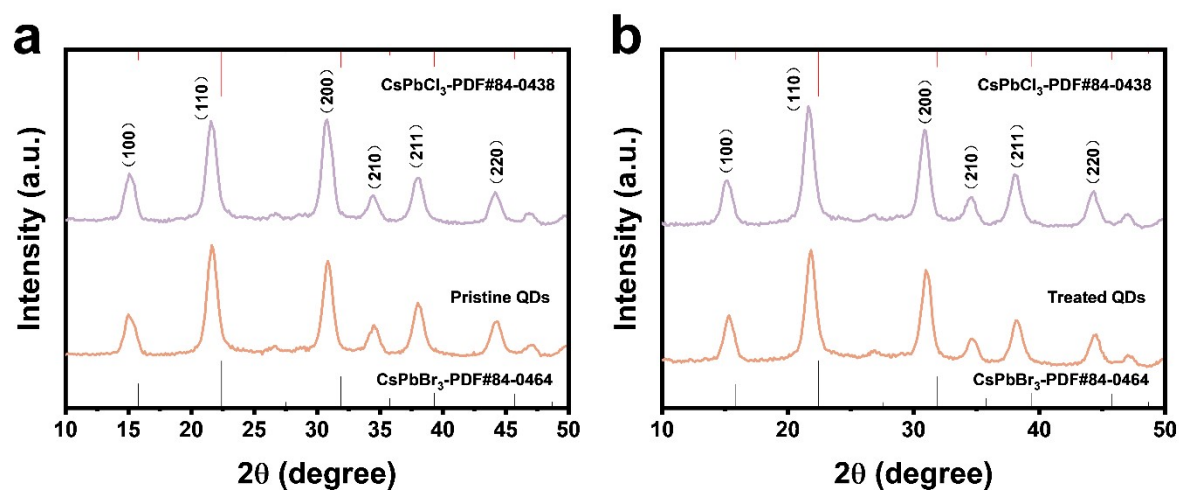

**Fig. S12** XRD patterns of pristine QDs and treated QDs before and after UV illumination for 2h (365 nm).

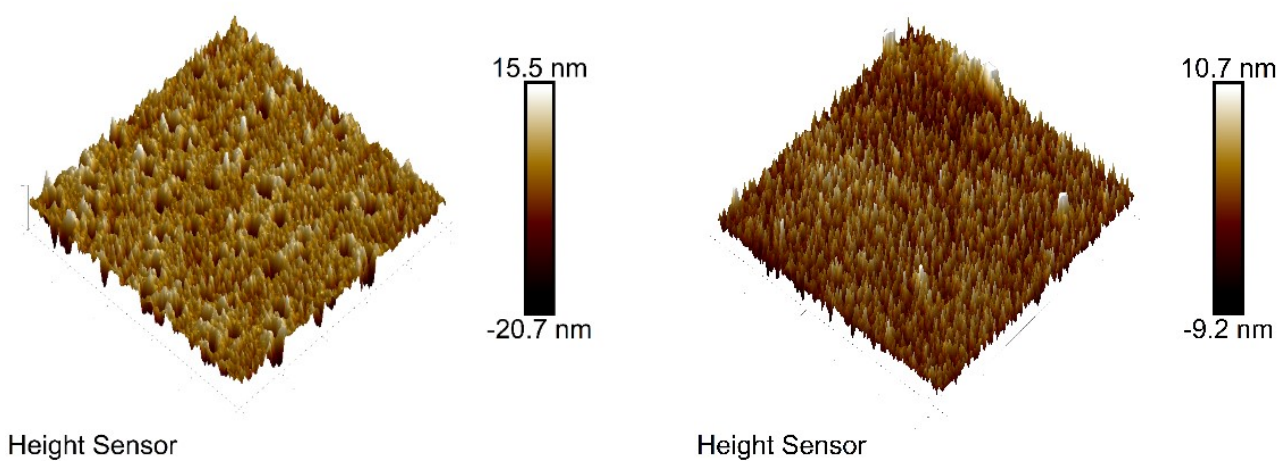

**Fig. S13** AFM images of the pristine and treated QDs.

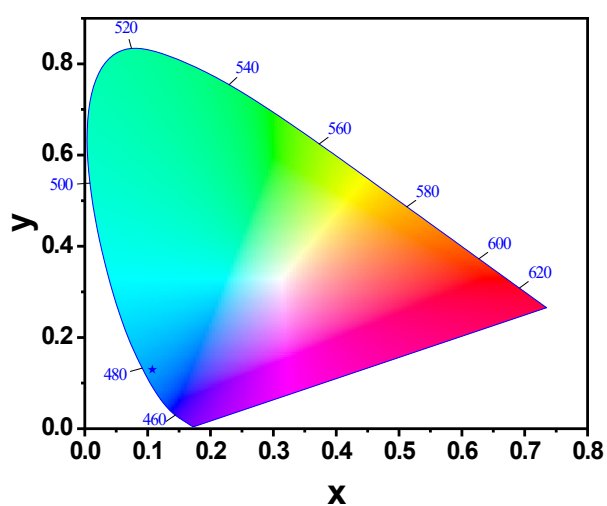

**Fig. S14** CIE coordinates of the target PeLEDs.

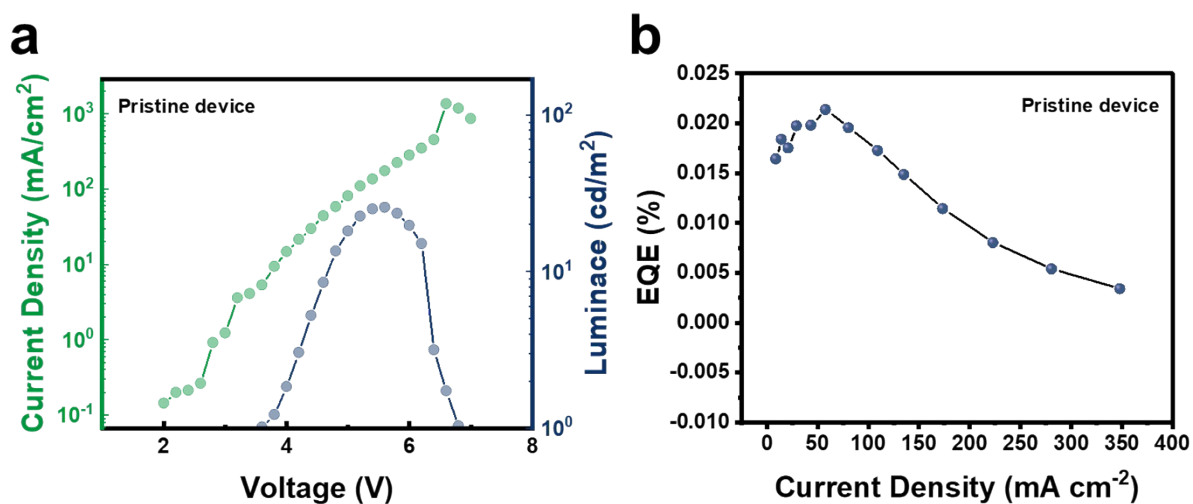

**Fig. S15** a) Current density–voltage–luminance curves, b) current density-EQE curves of the treated PeLEDs.

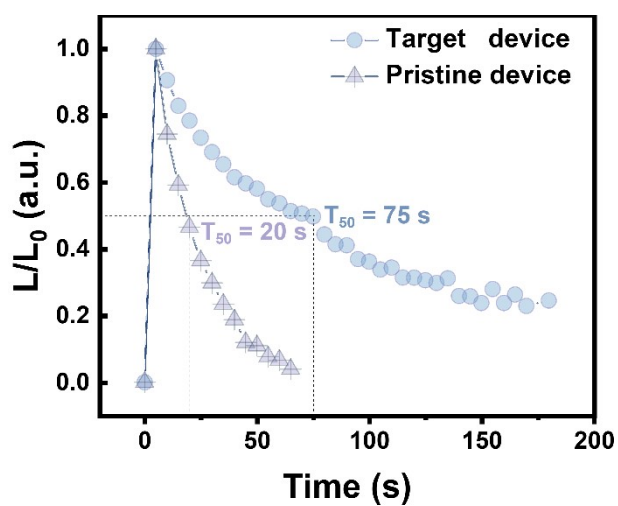

**Fig. S16** Luminance decay of the pristine and target device operating in initial luminance of about  $100 \text{ cd}/\text{m}^2$  (Target device) and  $30 \text{ cd}/\text{m}^2$  (Pristine device).

**Table S1.** Fitted elemental contents of pristine and treated QDs by XPS.

| Element  | C     | O     | Cs   | Pb   | Br   | Cl   | N    | P    |
|----------|-------|-------|------|------|------|------|------|------|
| Pristine | 75.30 | 20.57 | 0.38 | 0.47 | 1.66 | 0.58 | 1.04 | 0    |
| Treated  | 69.10 | 26.07 | 0.52 | 0.58 | 1.89 | 0.57 | 0.73 | 0.54 |

**Table S2.** Summary of time-resolved PL fitting parameters of pristine, 5%, 8% DPH-treated QDs.

| Sample    | A <sub>1</sub> | $\tau_1$<br>(ns) | A <sub>2</sub> | $\tau_2$<br>(ns) | A <sub>3</sub> | $\tau_3$<br>(ns) | $\tau_{ave}$<br>(ns) | K <sub>nonrad</sub><br>( $\mu s^{-1}$ ) | K <sub>rad</sub><br>( $\mu s^{-1}$ ) |
|-----------|----------------|------------------|----------------|------------------|----------------|------------------|----------------------|-----------------------------------------|--------------------------------------|
| Pristine  | 420.88<br>145  | 3.269<br>96      | 1091.37<br>525 | 17.807<br>14     | 452.169<br>68  | 64.745<br>37     | 44.84343<br>654      | 8.870863<br>401                         | 13.42894<br>404                      |
| 5%<br>DPH | 449.39<br>387  | 4.526<br>97      | 1155.79<br>813 | 20.518<br>83     | 375.94<br>413  | 66.104<br>18     | 42.26383<br>165      | 3.120871<br>792                         | 20.54002<br>125                      |
| 8%<br>DPH | 463.07<br>809  | 4.321<br>23      | 1208.17<br>392 | 18.845<br>4      | 346.248<br>8   | 62.125<br>96     | 38.33402<br>934      | 2.313871<br>031                         | 23.77261<br>184                      |

## Reference

- 1 M. Shukla, N. Brahme, R. S. Kher, M. S. K. Khokhar, Elementary approach to calculate quantum efficiency of polymer light emitting diodes, *Indian J. Pure Appl. Phys.*, 2011, **49**, 142-145.
